# Supplementary material
Source: MDPI journal article supplement (https://www.mdpi.com/2304-6740/6/1/16)
Supplement: s1 [file s1]

# Six-Coordinate Ln(III) Complexes with Various Coordination Geometries Showing Distinct Magnetic Properties

**Table S1.** Selected bond distances [Å] and angles [°] for complexes **1Dy**, **1Er**, and **2Dy**.

| <b>1Dy</b> |             | <b>1Er</b> |             | <b>2Dy</b> |            |
|------------|-------------|------------|-------------|------------|------------|
| Dy1-O1     | 2.167(3)    | Er1-O1     | 2.146(5)    | Dy1-O1     | 2.208(3)   |
| Dy1-O2     | 2.154(2)    | Er1-O2     | 2.128(4)    | Dy1-O2     | 2.182(3)   |
| Dy1-O3     | 2.144(3)    | Er1-O3     | 2.123(5)    | Dy1-O3     | 2.275(3)   |
| Dy1-N1     | 2.606(3)    | Er1-N1     | 2.567(5)    | Dy1-O4     | 2.170(3)   |
| Dy1-N2     | 2.481(3)    | Er1-N2     | 2.462(6)    | Dy1-N3     | 2.515(4)   |
| Dy1-N3     | 2.446(3)    | Er1-N3     | 2.411(4)    | Dy1-N4     | 2.662(4)   |
| O1-Dy1-N1  | 71.48(10)   | O1-Er1-N1  | 71.97(18)   | O1-Dy1-O2  | 89.08(12)  |
| O2-Dy1-N2  | 74.90(9)    | O2-Er1-N2  | 76.17(18)   | O3-Dy1-O4  | 155.23(12) |
| O3-Dy1-N3  | 74.43(9)    | O3-Er1-N3  | 75.46(17)   | N3-Dy1-N4  | 68.88(12)  |
| O1-Dy1-O2  | 142.05(11)  | O1-Er1-O2  | 140.6(2)    | O1-Dy1-O3  | 96.78(11)  |
| O2-Dy1-O3  | 132.32(10)  | O2-Er1-O3  | 132.89(19)  | O2-Dy1-N3  | 166.62(12) |
| O1-Dy1-O3  | 84.63(11)   | O1-Er1-O3  | 84.9(2)     | O1-Dy1-N4  | 171.36(13) |
| Dy···Dy    | 10.8822(15) | Er···Er    | 10.9407(12) | Dy···Dy    | 10.3614(9) |

**Table S2.** Lanthanide geometry analysis by SHAPE software for **1Dy**, **1Er**, and **2Dy**.

| Geometry   | Hexagon<br>( $D_{6h}$ ) | Pentagonal<br>pyramid<br>( $C_{5v}$ ) | Octahedron<br>( $O_h$ ) | Trigonal prism<br>( $D_{3h}$ ) |
|------------|-------------------------|---------------------------------------|-------------------------|--------------------------------|
| <b>1Dy</b> | 27.53                   | 11.96                                 | 18.20                   | <b>2.36</b>                    |
| <b>1Er</b> | 27.97                   | 12.40                                 | 17.59                   | <b>2.06</b>                    |
| <b>2Dy</b> | 27.79                   | 24.33                                 | <b>1.70</b>             | 13.33                          |

**Table S3.** Best-fit parameters for the Arrhenius plots of **1Dy** and **1Er**.

| Compound            | $U_{\text{eff}} / \text{K}$ | $\tau_0 / \text{s}$   | $\tau_{\text{QTM}} / \text{ms}$ | $AH^2$ | $C (\text{s}^{-1}\text{K}^{-n})$ | n     |
|---------------------|-----------------------------|-----------------------|---------------------------------|--------|----------------------------------|-------|
| <b>1Dy</b>          | 31.40                       | $3.56 \times 10^{-4}$ | 0.303                           | —      | 1.375                            | 2.997 |
| <b>1Er</b> (400 Oe) | 23.96                       | $5.46 \times 10^{-8}$ | 0.414                           | —      | 0.0059                           | 10.68 |

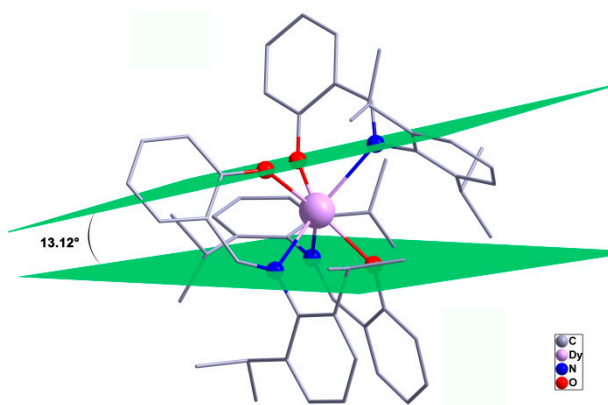

**Figure S1.** X-ray structures of complex **1Dy**. The green planes represent the coordination planes with labeled dihedral angle ( $\theta$ ). Hydrogen atoms have been omitted for clarity.

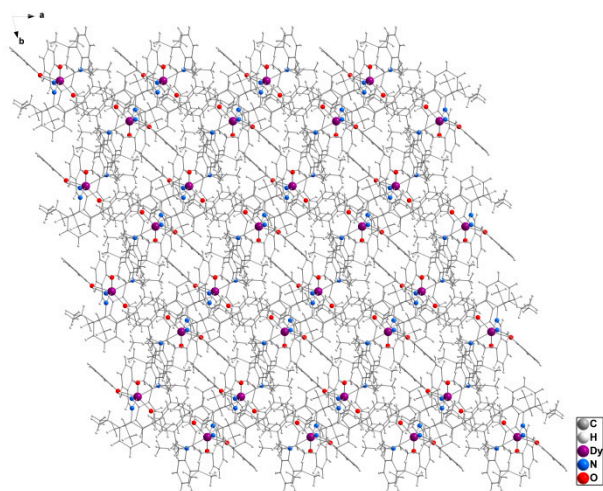

**Figure S2.** Packing diagram of **1Dy** viewed along the *c*-axis.

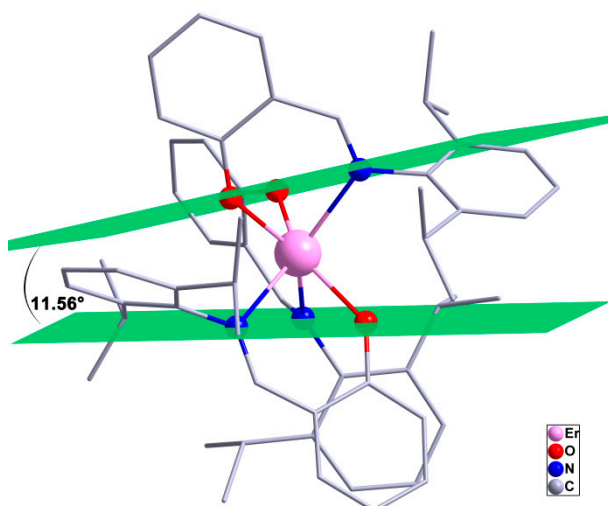

**Figure S3.** X-ray structures of complexes **1Er**. The green planes represent the coordination planes with labeled dihedral angle ( $\theta$ ). Hydrogen atoms have been omitted for clarity.

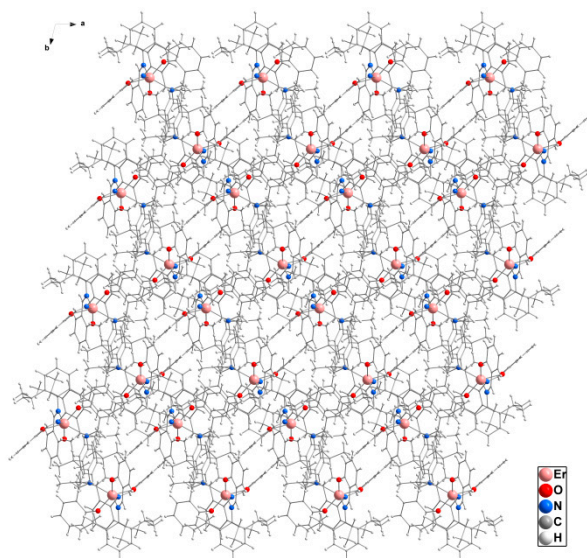

**Figure S4.** Packing diagram of **1Er** viewed along the *c*-axis.

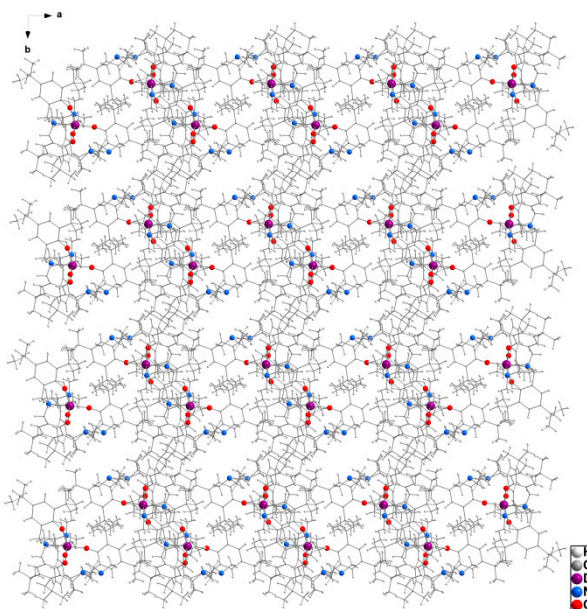

**Figure S5.** Packing diagram of **2Dy** viewed along the *c*-axis.

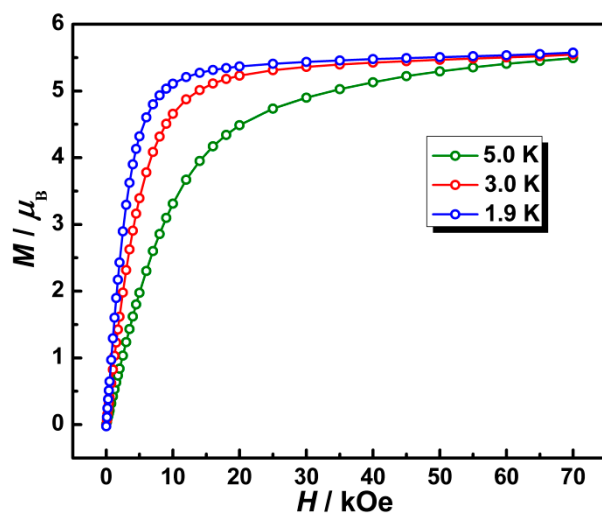

**Figure S6.** Molar magnetization ( $M$ ) versus field ( $H$ ) for complex **1Dy** at 1.9, 3.0, and 5.0 K.

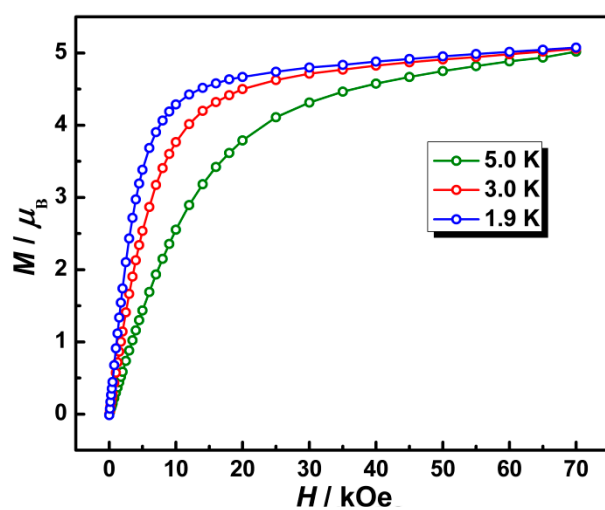

**Figure S7.** Molar magnetization ( $M$ ) versus field ( $H$ ) for complex **1Er** at 1.9, 3.0, and 5.0 K.

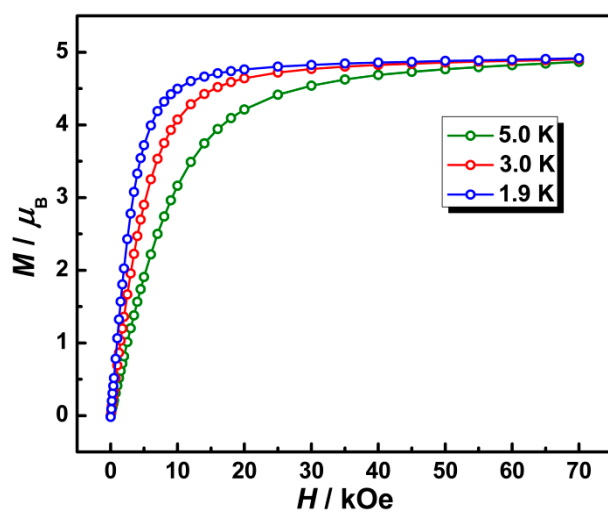

**Figure S8.** Molar magnetization ( $M$ ) versus field ( $H$ ) for complex **2Dy** at 1.9, 3.0, and 5.0 K.

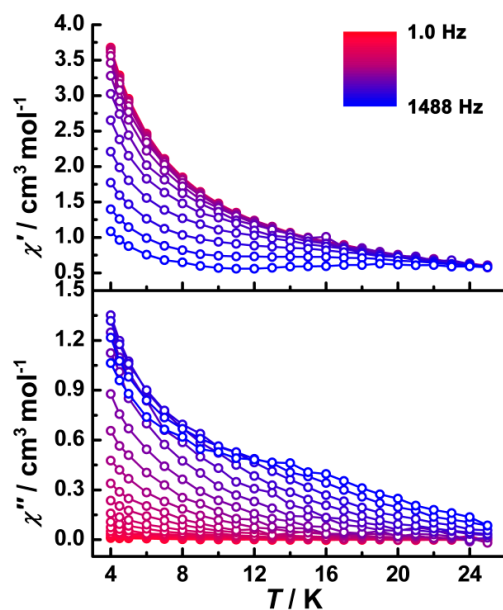

**Figure S9.** Temperature-dependent in-phase ( $\chi'$ ) and-out-of phase ( $\chi''$ ) ac susceptibilities for complex **1Dy** at indicated frequencies under zero dc field.

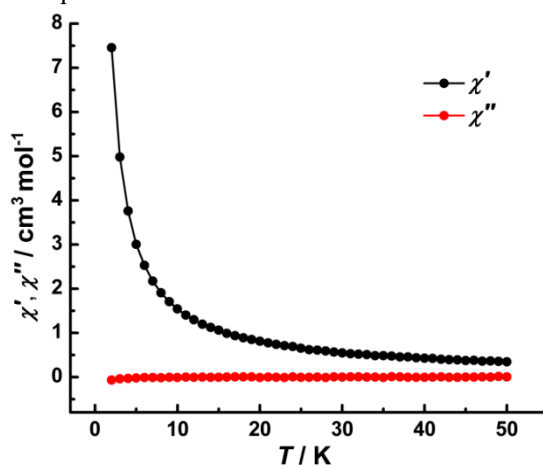

**Figure S10.** Temperature-dependent in-phase ( $\chi'$ ) and out-of-phase ( $\chi''$ ) ac susceptibilities for complex **1Er** under zero dc field.

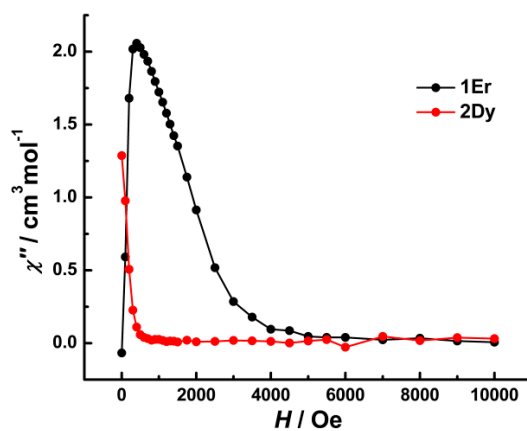

**Figure S11.** The field dependence of the out-of-phase signals of **1Er** and **2Dy** on applied dc field strength at 1.9 K and 997 Hz.

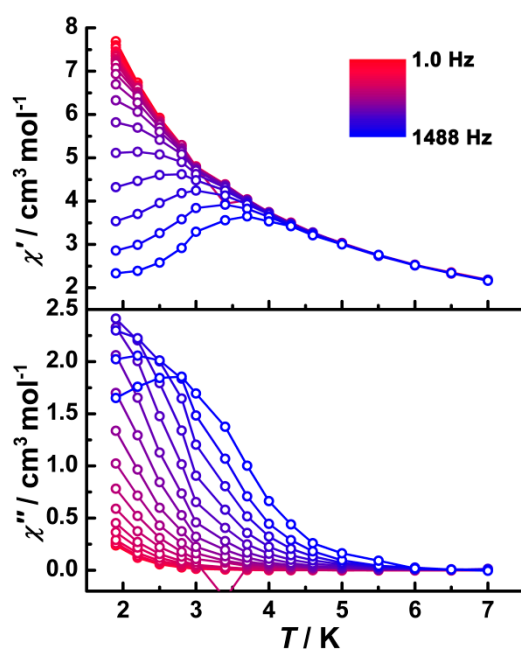

**Figure S12.** Temperature-dependent in-phase ( $\chi'$ ) and out-of-phase ( $\chi''$ ) ac susceptibilities for complex **1Er** under 400 Oe dc field.

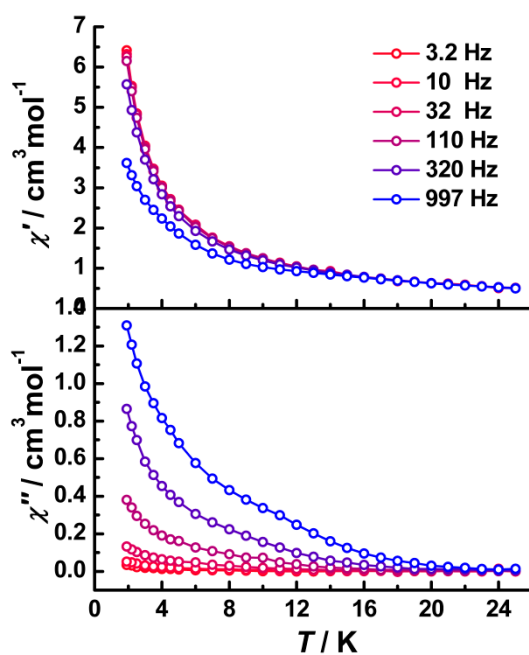

**Figure S13.** Temperature-dependent in-phase ( $\chi'$ ) and out-of-phase ( $\chi''$ ) ac susceptibilities for complex **2Dy** under zero dc field.
